# Supplementary material for: Measuring subaqueous progradation of the Wax Lake Delta with a model of flow direction divergence
Source: Copernicus journal article supplement (doi:10.5194/esurf-6-1155-2018), 2018-11-30
Supplement: Supplementary file 1 [file esurf-6-1155-2018-supplement.zip]

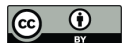

## *Supplement of*

# **Measuring subaqueous progradation of the Wax Lake Delta with a model of flow direction divergence**

**John B. Shaw et al.**

*Correspondence to:* John B. Shaw ([shaw84@uark.edu](mailto:shaw84@uark.edu))

- [esurf-6-1155-2018-supplement-title-page.pdf](#)
- [Supplementary Material\\_v1](#)
  - [Streak\\_Divergence\\_Supplement.pdf](#)
  - [SupplementaryData\\_v1.xlsx](#)

The copyright of individual parts of the supplement might differ from the CC BY 4.0 License.
